# Supplementary material for: Evaluation of Metabolomics as Diagnostic Targets in Oral Squamous Cell Carcinoma: A Systematic Review
Source: MDPI journal article supplement (doi:10.3390/metabo13080890), 2023-07-27
Supplement: s1 [file s1]

## SUPPLEMENTARY FILE

---

**Title: Evaluation of metabolomics as diagnostic targets in oral squamous cell carcinoma: a systematic review.**

**Authors: Susanth Alapati<sup>1</sup>, Giulio Fortuna<sup>2</sup>, Gordon Ramage<sup>1</sup>, and Christopher Delaney<sup>1\*</sup>**

\*Correspondence: christopher.delaney@glasgow.ac.uk

<sup>1</sup>Oral Sciences Research Group, Glasgow Dental School, School of Medicine, Dentistry and Nursing, University of Glasgow, 378 Sauchiehall Street, Glasgow, United Kingdom, G2 3JZ

<sup>2</sup>Department of Oral Medicine, Glasgow Dental School, School of Medicine, Dentistry and Nursing, University of Glasgow, 378 Sauchiehall Street, Glasgow, United Kingdom, G2 3JZ

**Supplementary Table S1:** Detailed search strategy across the databases.

| Database                  | No. | Search Statement                                                                                                                                                                                                                         |
|---------------------------|-----|------------------------------------------------------------------------------------------------------------------------------------------------------------------------------------------------------------------------------------------|
| <b>Medline<br/>(Ovid)</b> | 1   | (oral or mouth or "oral cavity" or oropharynx* or tongue or "base of tongue" or "floor of mouth" or palat* or lingual or buccal or lip or labial or "oral mucosa*" or retromolar or cheek or gingiva* or intra-oral or vermillion).mp.   |
|                           | 2   | (cancer* or tumor* or tumour* or malignant* or neoplasm* or carcinoma* or squamous or squamous cell* or OSCC or soft tissue or HPV-positive or HPV-negative or HPV+ve or HPV-ve).mp.                                                     |
|                           | 3   | (metabolomic* OR metabonomic* OR "metabolic profiling" OR metabolome OR "metabolite marker" OR "metabolite biomarker").mp.                                                                                                               |
|                           | 4   | 1 AND 2 AND 3                                                                                                                                                                                                                            |
| Database                  | No. | Search Statement                                                                                                                                                                                                                         |
| <b>Embase<br/>(Ovid)</b>  | 1   | (oral or mouth or "oral cavity" or oropharynx* or tongue or "base of tongue" or "floor of mouth" or palat* or lingual or buccal or lip or labial or "oral mucosa*" or retromolar or cheek or gingiva* or "intra-oral" or vermillion).mp. |
|                           | 2   | (cancer* or tumor* or tumour* or malignant* or neoplasm* or carcinoma* or squamous or squamous cell* or OSCC or soft tissue or HPV-positive or HPV-negative or HPV+ve or HPV-ve).mp.                                                     |
|                           | 3   | (metabolomic* OR metabonomic* OR 'metabolic profiling' OR metabolome OR 'metabolite marker' OR 'metabolite biomarker').mp                                                                                                                |
|                           | 4   | 1 and 2 and 3                                                                                                                                                                                                                            |
| Database                  | No. | Search Statement                                                                                                                                                                                                                         |
| <b>Cochrane</b>           | 1   | (oral or mouth or "oral cavity" or oropharynx* or tongue or "base of tongue" or "floor of mouth" or palat* or lingual or buccal or lip or labial or "oral mucosa*" or retromolar or cheek or gingiva* or "intra-oral" or vermillion)     |
|                           | 2   | (cancer* or tumor* or tumour* or malignant* or neoplasm* or carcinoma* or squamous or squamous cell* or OSCC or soft tissue or HPV-positive or HPV-negative)                                                                             |
|                           | 3   | (metabolomic* OR metabonomic* OR "metabolic profiling" OR metabolome OR "metabolite marker" OR "metabolite biomarker")                                                                                                                   |
|                           | 4   | 1 and 2 and 3                                                                                                                                                                                                                            |

| Database                              | No.                                                                                                                                                                                                                                                                                                                                                                                                                                                                                                                                                                                                                                                                                                                                                                                                                                                                                                                                                              | Search Statement                                                                                                                                                                                                                                |
|---------------------------------------|------------------------------------------------------------------------------------------------------------------------------------------------------------------------------------------------------------------------------------------------------------------------------------------------------------------------------------------------------------------------------------------------------------------------------------------------------------------------------------------------------------------------------------------------------------------------------------------------------------------------------------------------------------------------------------------------------------------------------------------------------------------------------------------------------------------------------------------------------------------------------------------------------------------------------------------------------------------|-------------------------------------------------------------------------------------------------------------------------------------------------------------------------------------------------------------------------------------------------|
| <b>CINAHL</b>                         | 1                                                                                                                                                                                                                                                                                                                                                                                                                                                                                                                                                                                                                                                                                                                                                                                                                                                                                                                                                                | (oral or mouth or "oral cavity" or oropharynx* or tongue or "base of tongue" or "floor of mouth" or palat* or lingual or buccal or lip or labial or "oral mucosa*" or retromolar or cheek or gingiva* or "intra-oral" or vermillion) 'All text' |
|                                       | AND 2                                                                                                                                                                                                                                                                                                                                                                                                                                                                                                                                                                                                                                                                                                                                                                                                                                                                                                                                                            | (cancer* or tumor* or tumour* or malignant* or neoplasm* or carcinoma* or squamous or squamous cell* or OSCC or soft tissue or HPV-positive or HPV-negative or HPV+ve or HPV-ve) 'All text'                                                     |
|                                       | AND 3                                                                                                                                                                                                                                                                                                                                                                                                                                                                                                                                                                                                                                                                                                                                                                                                                                                                                                                                                            | (metabolomic* OR metabonomic* OR "metabolic profiling" OR metabolome OR "metabolite marker" OR "metabolite biomarker") 'All text'                                                                                                               |
|                                       | AND 4                                                                                                                                                                                                                                                                                                                                                                                                                                                                                                                                                                                                                                                                                                                                                                                                                                                                                                                                                            | 1 AND 2 AND 3                                                                                                                                                                                                                                   |
| Database                              | Search Statement                                                                                                                                                                                                                                                                                                                                                                                                                                                                                                                                                                                                                                                                                                                                                                                                                                                                                                                                                 |                                                                                                                                                                                                                                                 |
| <b>Web of Science Core Collection</b> | <p>TS=(oral or mouth or "oral cavity" or oropharynx* or tongue or "base of tongue" or "floor of mouth" or palat* or lingual or buccal or lip or labial or "oral mucosa*" or retromolar or cheek or gingiva* or "intra-oral" or vermillion) AND</p> <p>TS=(cancer* or tumor* or tumour* or malignant* or neoplasm* or carcinoma* or squamous or squamous cell* or OSCC or soft tissue or HPV-positive or HPV-negative or HPV+ve or HPV-ve) AND</p> <p>TS=(metabolomic* OR metabonomic* OR "metabolic profiling" OR metabolome OR "metabolite marker" OR "metabolite biomarker")</p>                                                                                                                                                                                                                                                                                                                                                                               |                                                                                                                                                                                                                                                 |
| Database                              | Search Statement                                                                                                                                                                                                                                                                                                                                                                                                                                                                                                                                                                                                                                                                                                                                                                                                                                                                                                                                                 |                                                                                                                                                                                                                                                 |
| <b>ProQuest</b>                       | <p>(TI,AB,IF(oral) OR TI,AB,IF(mouth) OR TI,AB,IF("oral cavity") OR TI,AB,IF(oropharynx*) OR TI,AB,IF(tongue) OR TI,AB,IF("base of tongue") OR TI,AB,IF("floor of mouth") OR TI,AB,IF(palat*) OR TI,AB,IF(lingual) OR TI,AB,IF(buccal) OR TI,AB,IF(lip) OR TI,AB,IF(labial) OR TI,AB,IF("oral mucosa*") OR TI,AB,IF(retromolar) OR TI,AB,IF(cheek) OR TI,AB,IF(gingiva*) OR TI,AB,IF(intra-oral) OR TI,AB,IF(vermillion)) AND</p> <p>(TI,AB,IF(cancer*) OR TI,AB,IF(tumor*) OR TI,AB,IF(tumour*) OR TI,AB,IF(malignant*) OR TI,AB,IF(neoplasm*) OR TI,AB,IF(carcinoma*) OR TI,AB,IF(squamous) OR TI,AB,IF("squamous cell*") OR TI,AB,IF(OSCC) OR TI,AB,IF("soft tissue") OR TI,AB,IF(HPV-positive) OR TI,AB,IF(HPV-negative) OR TI,AB,IF(HPV+ve) OR TI,AB,IF(HPV-ve)) AND (TI,AB,IF(metabolomic*) OR TI,AB,IF(metabonomic*) OR TI,AB,IF("metabolic profiling") OR TI,AB,IF(metabolome) OR TI,AB,IF("metabolite marker") OR TI,AB,IF("metabolite biomarker"))</p> |                                                                                                                                                                                                                                                 |

Table S2

|                                                                       | Ishikawa et al., (2016) [35] | Syed et al., (2016) [42] | Ishikawa et al., (2017) [36] | Enomoto et al., (2018) [38] | Ishikawa et al., (2018) [39] | Ishikawa et al., (2019) [40] | Sridharan et al., (2019) [41] | De Sa Alves et al., (2021) [37] | Song et al., (2019) [22] | Tsai et al., (2020) [43] | Yang et al., (2020) [44] | Yang et al., (2021) [20] | Li et al., (2022) [23] |
|-----------------------------------------------------------------------|------------------------------|--------------------------|------------------------------|-----------------------------|------------------------------|------------------------------|-------------------------------|---------------------------------|--------------------------|--------------------------|--------------------------|--------------------------|------------------------|
| <b>Clearly stated research question and objectives</b>                | Yes                          | Yes                      | Yes                          | Yes                         | Yes                          | Yes                          | Yes                           | Yes                             | Yes                      | Yes                      | Yes                      | Yes                      | Yes                    |
| <b>Valid inclusion and exclusion criteria</b>                         | Not clear                    | Yes                      | Not clear                    | Yes                         | Yes                          | Yes                          | Yes                           | Yes                             | Yes                      | Yes                      | Yes                      | No                       | Yes                    |
| <b>Spectrum of patients representative of the disease of interest</b> | Yes                          | Yes                      | Yes                          | Yes                         | Yes                          | Yes                          | Yes                           | Yes                             | Yes                      | Yes                      | Yes                      | Yes                      | Yes                    |
| <b>Sample size justification</b>                                      | No                           | No                       | No                           | No                          | No                           | No                           | Yes                           | No                              | No                       | No                       | No                       | No                       | No                     |
| <b>Type of sample fully described</b>                                 | Yes                          | Yes                      | Yes                          | Not clear                   | Yes                          | Yes                          | Yes                           | Not clear                       | Yes                      | Yes                      | Not clear                | Yes                      | Not clear              |
| <b>Description of sample collection, handling and storage</b>         | Not clear                    | Yes                      | Yes                          | Yes                         | Yes                          | Yes                          | Yes                           | Yes                             | Yes                      | Yes                      | Not clear                | Yes                      | Not clear              |
| <b>Confounding factors like smoking, diet interferences addressed</b> | No                           | No                       | No                           | No                          | No                           | No                           | No                            | Not clear                       | Not clear                | Not clear                | No                       | No                       | No                     |
| <b>Randomisation of samples</b>                                       | No                           | No                       | No                           | Yes                         | No                           | No                           | No                            | No                              | No                       | No                       | No                       | No                       | No                     |
| <b>Description of pre-analytical processing of sample</b>             | Yes                          | Yes                      | Yes                          | Yes                         | Yes                          | Not clear                    | Yes                           | Yes                             | Yes                      | Yes                      | Not clear                | Yes                      | Yes                    |
| <b>Analytical methods clearly described</b>                           | Yes                          | Yes                      | Yes                          | Yes                         | Yes                          | Yes                          | No                            | Yes                             | Yes                      | Yes                      | Not clear                | Yes                      | Yes                    |
| <b>Clearly defined measures of risk/exposure</b>                      | Yes                          | No                       | Yes                          | Yes                         | Yes                          | Yes                          | Yes                           | Not clear                       | Yes                      | Yes                      | Yes                      | Yes                      | Yes                    |
| <b>Comprehensive details on statistical analysis</b>                  | Yes                          | No                       | Yes                          | Yes                         | Yes                          | Yes                          | Not clear                     | Yes                             | Yes                      | Yes                      | Yes                      | Yes                      | Yes                    |

### **R-Script for differentiation of upregulated and downregulated metabolites.**

```
#library(dbplyr)
#library(dplyr)
#library(tidyverse)
#Com_FoldChange <- read.csv("filename.csv")
#unique(Com_FoldChange$Comparison)
#Com_FoldChange<-Com_FoldChange %>% mutate(Comparison_order
=Com_FoldChange$`Comparison order`) %>% separate(.,'Comparison order', into = c("Positive",
"Negative"), sep = "_")
#Com_FoldChange<-Com_FoldChange %>% mutate(Comparison_order
=Com_FoldChange$`Comparison.order`) %>% separate(.,'Comparison.order', into = c("Positive",
"Negative"), sep = "_")
#View(Com_FoldChange)
#Com_FoldChange$log2_FoldChange<-log2(as.numeric(Com_FoldChange$`Fold Change`))
#Com_FoldChange$Metaboanalyst_name<-Com_FoldChange$`Metaboanalyst matched name`
#View(Com_FoldChange)
#Com_FoldChange_OSCC<-Com_FoldChange %>% filter(Positive == "OSCC")
#View(Com_FoldChange_OSCC)
#OSCC_UPregulated<- Com_FoldChange_OSCC %>% filter(log2_FoldChange >0)
#Studys_OSCC<-unique(Com_FoldChange_OSCC$Study)
#Com_FoldChange_OSCC<-Com_FoldChange %>% filter(Positive %in% c("OSCC")) %>%
#filter(Negative=="HC")
#View(Com_FoldChange_OSCC)
#OSCC_UPregulated <- Com_FoldChange_OSCC %>% filter(log2_FoldChange >0) %>%
#group_by(Metaboanalyst_name) %>%
#summarise(n = n())
#OSCC_DOWNregulated <- Com_FoldChange_OSCC %>% filter(log2_FoldChange <0) %>%
#group_by(Metaboanalyst_name) %>%
#summarise(n = n())
```

**Supplementary Table S3: Metabolite subgrouping into superclass and subclass.**

|                                        |            |
|----------------------------------------|------------|
| <b>Organic acid derivatives</b>        | <b>119</b> |
| Amino acids, peptides, and analogues   | 89         |
| Others Carboxylic acid derivatives     | 15         |
| Hydroxy acids and derivatives          | 4          |
| Keto acids and derivatives             | 3          |
| Phosphate esters                       | 3          |
| Carboximidic acids and derivatives     | 3          |
| Sulfinic acids and derivatives         | 2          |
| <b>Lipids</b>                          | <b>94</b>  |
| Fatty acids and Fatty acyls            | 48         |
| Other lipid derivatives                | 14         |
| Glycerophospholipids                   | 12         |
| Glycerols                              | 8          |
| Bile acids                             | 6          |
| Steroid esters                         | 6          |
| <b>Organoheterocyclic compounds</b>    | <b>46</b>  |
| Purines and purine derivatives         | 14         |
| Pyrimidines and pyrimidine derivatives | 13         |
| Other olines, lignans and ureas        | 9          |
| Pyridines and derivatives              | 4          |
| Piperidines                            | 2          |
| Azoles                                 | 2          |
| Indoles and derivatives                | 2          |
|                                        | <b>49</b>  |
| <b>Organic oxygen compounds</b>        |            |
| Alcohols and polyols                   | 6          |
| Carbohydrates                          | 43         |
| <b>Benzene and Benzene derivatives</b> | <b>11</b>  |
| Benzene and Benzene derivatives        | 8          |
| Phenol and Phenol derivatives          | 3          |
| <b>Organic nitrogen compounds</b>      | <b>9</b>   |
| Quaternary ammonium salts              | 5          |
| Amines                                 | 3          |
| Aminoxides                             | 1          |
| <b>Nucleosides</b>                     | <b>3</b>   |
| Purine and Pyrimidine Nucleosides      | 2          |
| 5'-deoxyribonucleosides                | 1          |
| <b>Homogeneous non-metal compounds</b> | <b>2</b>   |
| Non-metal phosphates                   | 2          |
| <b>Polyketides</b>                     | <b>4</b>   |
| Phenylpropanoids                       | 3          |
| Flavonoids                             | 1          |
